# Supplementary material for: The Brief Health Literacy Scale for Adults: Adaptation and Validation of the Health Literacy for School-Aged Children Questionnaire
Source: MDPI journal article supplement (doi:10.3390/ijerph20227071), 2023-11-16
Supplement: s1 [file s1]

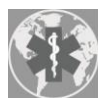

*Supplementary Materials*

# The Brief Health Literacy Scale for Adults: Adaptation and Validation of the Health Literacy for School-Aged Children Questionnaire

Stinne Eika Rasmussen <sup>1,2,\*</sup>, Anna Aaby <sup>2</sup>, Anne Søjbjerg <sup>1,2</sup>, Anna Mygind <sup>1</sup>, Helle Terkildsen Maindal <sup>2</sup>, Olli Paakkari <sup>3</sup> and Kaj Sparle Christensen <sup>1,2</sup>

<sup>1</sup> Research Unit for General Practice, Bartholins Allé 2, 8000 Aarhus C, Denmark; annsoj@ph.au.dk (A.S.); mygind@ph.au.dk (A.M.); kasc@ph.au.dk (K.S.C.)

<sup>2</sup> Department of Public Health, Aarhus University, Bartholins Allé 2, 8000 Aarhus C, Denmark; annaab@rm.dk (A.A.); htm@ph.au.dk (H.T.M.)

<sup>3</sup> Faculty of Sport and Health Sciences, Research Centre for Health Promotion, University of Jyväskylä, Keskussairaalan tie 4, 40014 Jyväskylä, Finland; olli.paakkari@jyu.fi

\* Correspondence: stinne.e.rasmussen@ph.au.dk

**Table S1.** Overview of the wording of the original Health Literacy for School-Aged Children (HLSAC) instrument in English [1], the Danish version of the HLSAC [2], the English version of the Brief Health Literacy scale for Adults (B-HLA), and the Danish version of the B-HLA.

|                     | <b>HLSAC original<br/>English version</b>                                                                                                     | <b>HLSAC<br/>Danish version</b>                                                                                                               | <b>B-HLA<br/>English version</b>                                                                                              | <b>B-HLA<br/>Danish version</b>                                                                                       |
|---------------------|-----------------------------------------------------------------------------------------------------------------------------------------------|-----------------------------------------------------------------------------------------------------------------------------------------------|-------------------------------------------------------------------------------------------------------------------------------|-----------------------------------------------------------------------------------------------------------------------|
| Instructing text    | From the following options, choose the one that best describes your opinion.<br>I am confident that...                                        | Vælg den mulighed nedenfor, der beskriver din mening bedst (Kun ét kryds ved hvert spørgsmål). Jeg er sikker på at...                         | From the following options, choose the one that best describes your opinion.<br>I am confident that...                        | Vælg den mulighed nedenfor, der bedst beskriver din mening.<br>Jeg er sikker på at...                                 |
| Response categories | Not at all true<br>Not completely true<br>Somewhat true<br>Absolutely true                                                                    | Slet ikke rigtigt<br>Ikke helt rigtigt<br>Nogenlunde rigtigt<br>Helt rigtigt                                                                  | Not at all true<br>Not completely true<br>Somewhat true<br>Absolutely true                                                    | Slet ikke rigtigt<br>Ikke helt rigtigt<br>Nogenlunde rigtigt<br>Helt rigtigt                                          |
| Items               |                                                                                                                                               |                                                                                                                                               |                                                                                                                               |                                                                                                                       |
| 1                   | I have good information about health                                                                                                          | Jeg har god viden om sundhed                                                                                                                  | I have good information about health                                                                                          | Jeg har god viden om sundhed                                                                                          |
| 2                   | When necessary, I am able to give ideas on how to improve health in my immediate surroundings (e.g., a nearby place or area, family, friends) | Hvis der er brug for det, kan jeg komme med ideer til at forbedre sundhed i mine nære omgivelser (fx et sted i nærheden, min familie, venner) | I am able to give ideas on how to improve health in my immediate surroundings (e.g., a nearby place or area, family, friends) | Jeg kan komme med ideer til at forbedre sundheden i mine nære omgivelser (fx et sted i nærheden, min familie, venner) |
| 3                   | I can compare health-related information from different sources                                                                               | Jeg kan sammenligne information om sundhed fra forskellige kilder                                                                             | I can compare health-related information from different sources                                                               | Jeg kan sammenligne information om sundhed fra forskellige kilder                                                     |
| 4                   | I can follow the instructions given to me                                                                                                     | Jeg kan følge de instruktioner, jeg får fra                                                                                                   | I can follow the advice given to me by                                                                                        | Jeg kan følge de anvisninger, jeg får fra                                                                             |

|    | by healthcare personnel (e.g., nurse, doctor)                                      | sundhedspersonale (fx sygeplejerske eller læge)                                      | healthcare personnel (e.g., nurse, doctor)                                | sundhedspersonale (fx sygeplejerske eller læge)                              |
|----|------------------------------------------------------------------------------------|--------------------------------------------------------------------------------------|---------------------------------------------------------------------------|------------------------------------------------------------------------------|
| 5  | I can easily give examples of things that promote health                           | Jeg kan nemt komme med eksempler på noget, der forbedrer sundhed                     | I can easily give examples of things that promote health                  | Jeg kan nemt komme med eksempler på noget, der forbedrer sundhed             |
| 6  | I can judge how my own actions affect the surrounding natural environment          | Jeg kan vurdere, hvordan mine handlinger påvirker miljøet omkring mig                | I can judge how my own actions affect the surrounding natural environment | Jeg kan vurdere, hvordan mine handlinger påvirker naturen omkring mig        |
| 7  | When necessary I find health-related information that is easy for me to understand | Hvis jeg har brug for det, finder jeg information om sundhed, som jeg let kan forstå | I can find health-related information that is easy for me to understand   | Jeg kan finde information om sundhed, som jeg let kan forstå                 |
| 8  | I can judge how my behaviour affects my health                                     | Jeg kan vurdere, hvordan min adfærd påvirker min sundhed                             | I can judge how my behaviour affects my health                            | Jeg kan vurdere, hvordan min adfærd påvirker min sundhed                     |
| 9  | I can usually figure out if some health-related information is right or wrong      | Jeg kan som regel finde ud af, om information om sundhed er rigtigt eller forkert    | I can usually decide if some health-related information is right or wrong | Jeg kan som regel vurdere, om information om sundhed er rigtig eller forkert |
| 10 | I can give reasons for choices I make regarding my health                          | Jeg kan forklare de valg jeg træffer i forhold til min sundhed                       | I can provide reason for choices I make regarding my health               | Jeg kan begrunde de valg jeg træffer i forhold til min sundhed               |

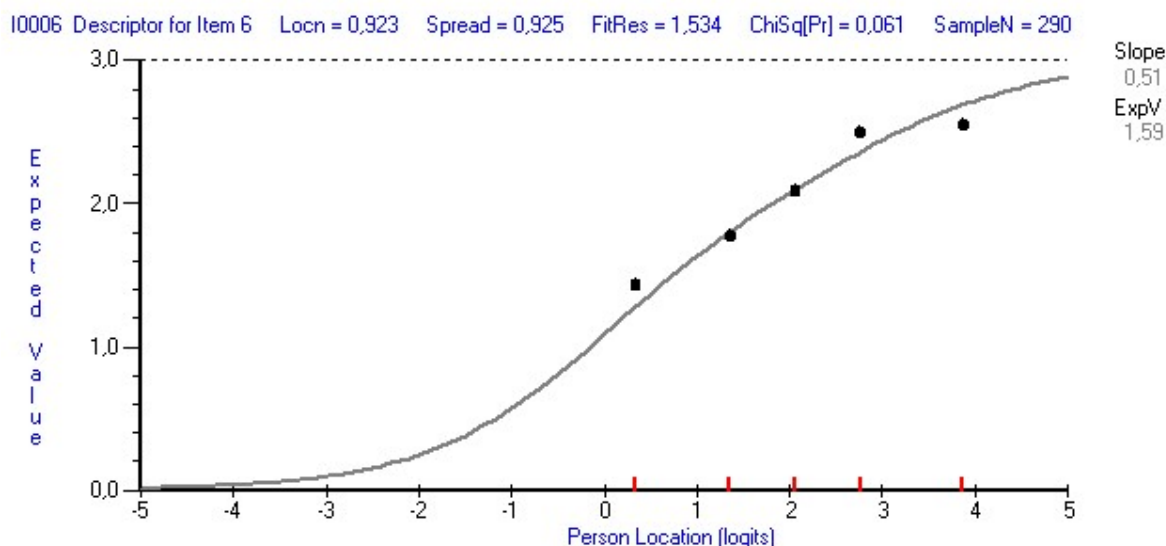

Figure S1. Item Characteristic Curve (ICC) for item 6.

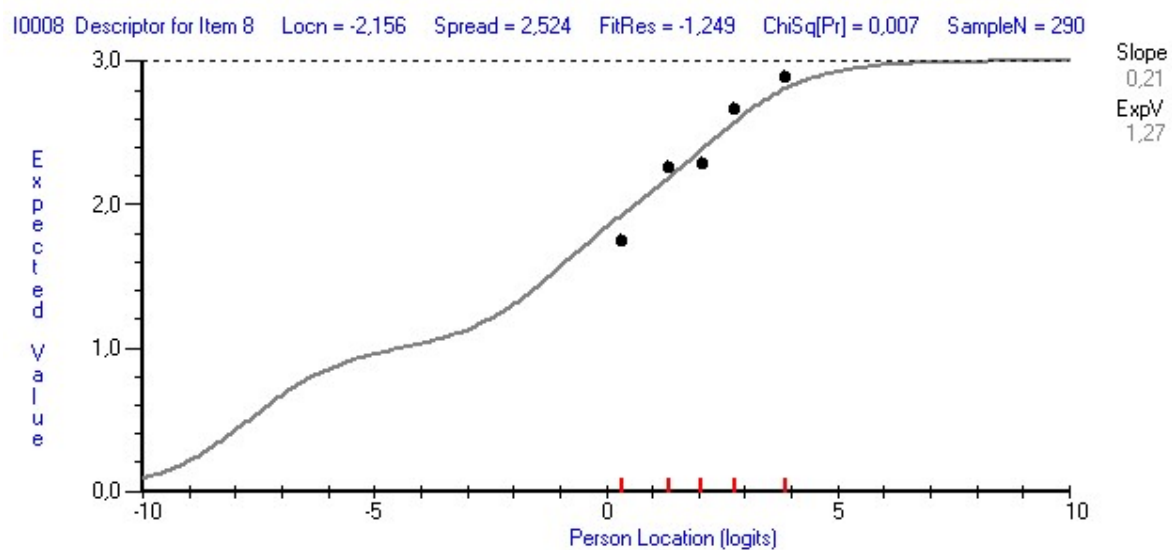

**Figure S2.** Item Characteristic Curve (ICC) for item 8.

## References

1. Paakkari, O.; Torppa, M.; Kannas, L.; Paakkari, L. Subjective health literacy: Development of a brief instrument for school-aged children. *Scand. J. Public Health* **2016**, *44*, 751–757.
2. Bonde, A.H.; Stjernqvist, N.W.; Klinker, C.D.; Maindal, H.T.; Paakkari, O.; Elsborg, P. Translation and Validation of a Brief Health Literacy Instrument for School-Age Children in a Danish Context. *Health Lit. Res. Pract.* **2022**, *6*, e26–e29.
